# Supplementary material for: Aliovalent-doped sodium chromium oxide (Na0.9Cr0.9Sn0.1O2 and Na0.8Cr0.9Sb0.1O2) for sodium-ion battery cathodes with high-voltage characteristics
Source: Royal Society of Chemistry journal article supplement (doi:10.1039/d0ra08332a), 2020-01-01
Supplement: d0ra08332a1.pdf [file d0ra08332a1.pdf]

## Supplementary Information

### **Aliovalent-doped sodium chromium oxide ( $\text{Na}_{0.9}\text{Cr}_{0.9}\text{Sn}_{0.1}\text{O}_2$ and $\text{Na}_{0.8}\text{Cr}_{0.9}\text{Sb}_{0.1}\text{O}_2$ ) as sodium-ion battery cathodes with high-voltage characteristics**

Woon Bae Park,<sup>‡a</sup> Muthu Gnana Theresa Nathan,<sup>‡a</sup> Su Cheol Han,<sup>a</sup> Jin-Woong Lee,<sup>b</sup> Kee-Sun Sohn<sup>\*b</sup> and MyoungHo Pyo<sup>\*a</sup>

<sup>a</sup> *Department of Printed Electronics Engineering, Suncheon National University, Suncheon, Chonnam 57922,*

*Republic of Korea. E-mail: mho@suncheon.ac.kr*

<sup>b</sup> *Faculty of Nanotechnology and Advanced Materials Engineering, Sejong University, Seoul 05006,*

*Republic of Korea. E-mail: kssohn@sejong.ac.kr*

<sup>‡</sup> These authors contributed equally to this work.

## List of contents

|                                                                                                                                                    |   |
|----------------------------------------------------------------------------------------------------------------------------------------------------|---|
| <b>Fig. S1</b> FESEM, elemental mapping images, and EDX spectra of NCSnO and NCSbO -----                                                           | 1 |
| <b>Fig. S2</b> Full-pattern Rietveld refinements of NCO, NCSnO, and NCSbO -----                                                                    | 2 |
| <b>Table S1</b> Lattice parameters and atomic coordinates of a P'3-phase ( $\text{Na}_{0.4}\text{CrO}_2$ ) in $\text{Na}_{0.3}\text{CrO}_2$ -----  | 3 |
| <b>Table S2</b> Lattice parameters and atomic coordinates of an O3-phase ( $\text{Na}_\delta\text{CrO}_2$ ) in $\text{Na}_{0.3}\text{CrO}_2$ ----- | 3 |
| <b>Table S3</b> Lattice parameters and atomic coordinates of $\text{Na}_{0.4}[\text{Cr}_{0.9}\text{Sn}_{0.1}]\text{O}_2$ -----                     | 4 |
| <b>Table S4</b> Lattice parameters and atomic coordinates of $\text{Na}_{0.3}[\text{Cr}_{0.9}\text{Sb}_{0.1}]\text{O}_2$ -----                     | 4 |

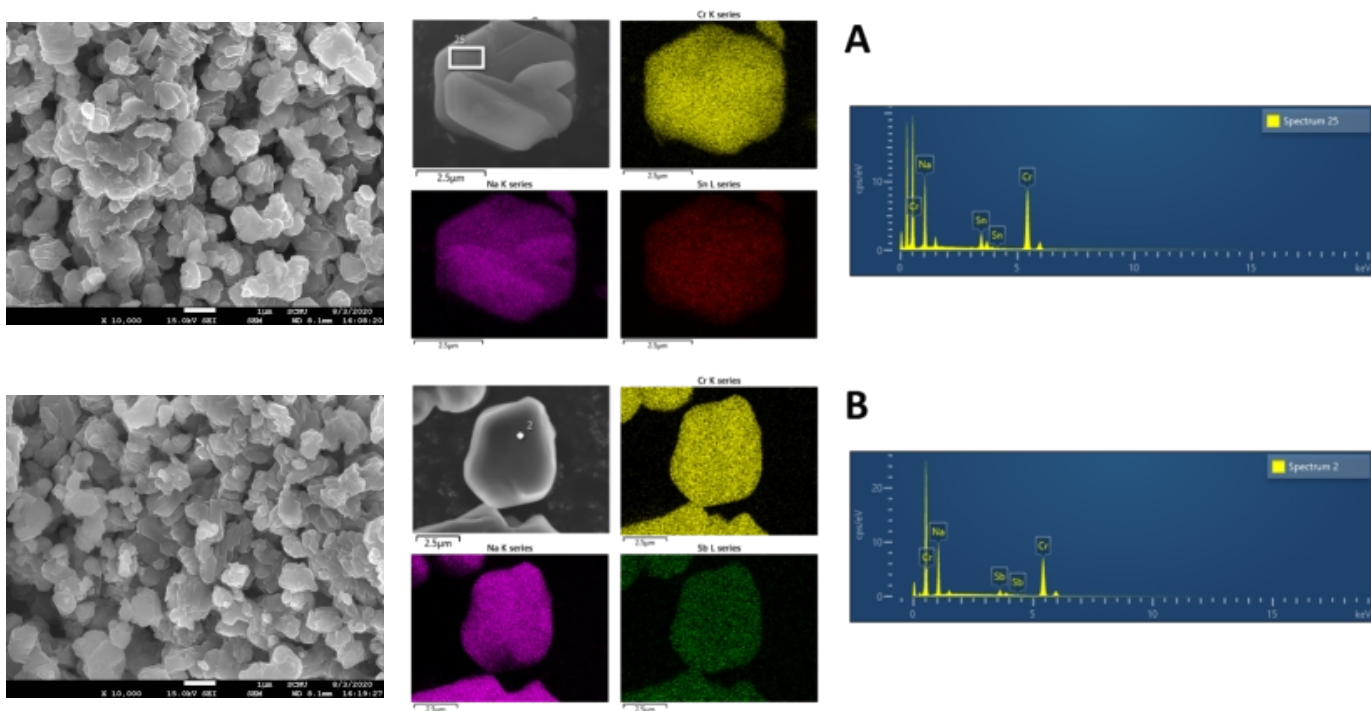

**Fig. S1.** FESEM and elemental mapping images with corresponding EDX spectra of (A) NCSnO and (B) NCSbO. EDX spectra indicate the composition of  $\text{Na}_{0.89\pm 0.02}\text{Cr}_{0.91\pm 0.02}\text{Sb}_{0.09\pm 0.01}\text{O}_2$  and  $\text{Na}_{0.80\pm 0.02}\text{Cr}_{0.91\pm 0.02}\text{Sb}_{0.09\pm 0.00}\text{O}_2$  for NCSnO and NCSbO, respectively,

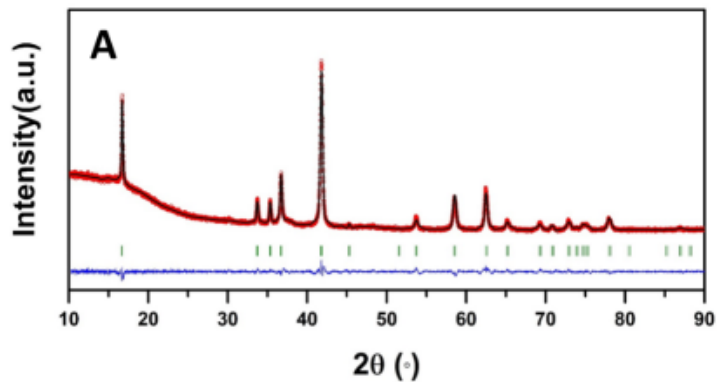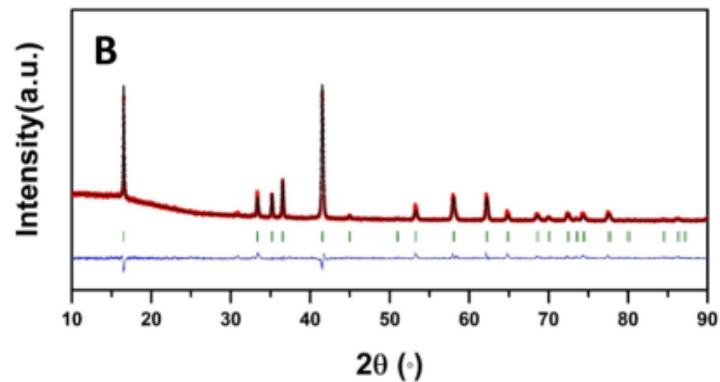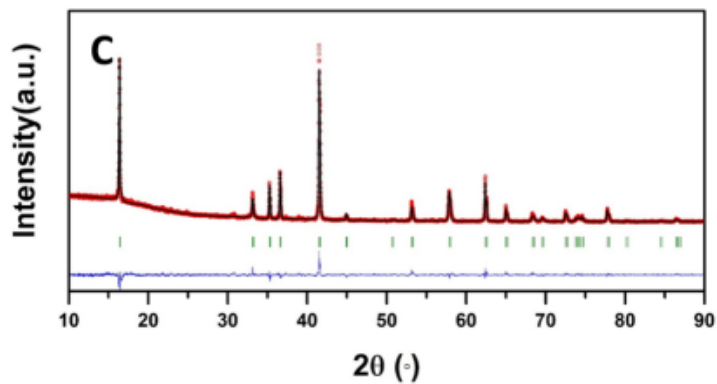

**Fig. S2.** Full-pattern Rietveld refinements of (A) NCO, (B) NCSnO, and (C) NCSbO. Experimental, calculated, and difference profiles are shown by the red dots, black line, and blue line, respectively. The green vertical tick marks above the difference profile denote the positions of Bragg reflections. For the best fit between the observed and calculated data, the profile shapes were defined using a pseudo-Voigt function. No preferred orientation was applied.

**Table S1** Lattice parameters and atomic coordinates of a P'3 phase ( $\text{Na}_{0.4}\text{CrO}_2$ ) in  $\text{Na}_{0.3}\text{CrO}_2$ .

| Atom | Wyckoff symbol | x/a       | y/b | z/c       | U ( $\text{\AA}^2$ ) | S.O.F. |
|------|----------------|-----------|-----|-----------|----------------------|--------|
| Na   | 4i             | 0.202 (7) | 0   | 0.553 (9) | 0.004 (4)            | 0.2    |
| Cr   | 2a             | 0         | 0   | 0         | 0.0057 (20)          | 1      |
| O    | 4i             | 0.397 (9) | 0   | 0.177 (2) | 0.004 (16)           | 1      |

Space group:  $C2/m$   
Number of formula per unit cell ( $z$ ) = 2  
Lattice parameters:  $a = 4.990 (4) \text{ \AA}$ ,  $b = 2.892 (2) \text{ \AA}$ ,  $c = 5.902 (3) \text{ \AA}$ ,  $\alpha = \gamma = 90^\circ$ ,  $\beta = 106.60 (9)^\circ$

**Table S2** Lattice parameters and atomic coordinates of an O3' phase ( $\text{Na}_8\text{CrO}_2$ ) in  $\text{Na}_{0.3}\text{CrO}_2$ .

| Atom | Wyckoff symbol | x/a | y/b | z/c       | U ( $\text{\AA}^2$ ) | S.O.F. |
|------|----------------|-----|-----|-----------|----------------------|--------|
| Cr   | 3a             | 0   | 0   | 0         | 0.0036               | 0.667  |
| Cr   | 6c             | 0   | 0   | 0.126 (2) | 0.0121               | 0.167  |
| O    | 6c             | 0   | 0   | 0.249 (4) | 0.0108               | 1      |

Space group:  $R-3m$   
Number of formula per unit cell ( $z$ ) = 3  
Lattice parameters:  $a = 2.899 (1) \text{ \AA}$ ,  $c = 13.905 (9) \text{ \AA}$ ,  $\alpha = \beta = 90^\circ$ ,  $\gamma = 120^\circ$

**Table S3** Lattice parameters and atomic coordinates of Na<sub>0.4</sub>[Cr<sub>0.9</sub>Sn<sub>0.1</sub>]O<sub>2</sub>.

| Atom | Wyckoff symbol | x/a       | y/b | z/c        | U (Å <sup>2</sup> ) | S.O.F. |
|------|----------------|-----------|-----|------------|---------------------|--------|
| Na   | 4i             | 0.252 (4) | 0   | 0.499 (3)  | 0.037 (10)          | 0.2    |
| Cr   | 2a             | 0         | 0   | 0          | 0.0003 (7)          | 0.9    |
| Sn   | 2a             | 0         | 0   | 0          | 0.0003 (7)          | 0.1    |
| O    | 4i             | 0.389 (4) | 0   | 0.1735 (8) | 0.0227 (18)         | 1.0    |

Space group: *C2/m*  
Number of formula per unit cell (z) = 2  
Lattice parameters: a = 5.0663 (4) Å, b = 2.9259 (2) Å, c = 5.9331 (2) Å, α = γ = 90°, β = 106.28 (1)°

**Table S4** Lattice parameters and atomic coordinates of Na<sub>0.3</sub>[Cr<sub>0.9</sub>Sb<sub>0.1</sub>]O<sub>2</sub>.

| Atom | Wyckoff symbol | x/a         | y/b | z/c        | U (Å <sup>2</sup> ) | S.O.F. |
|------|----------------|-------------|-----|------------|---------------------|--------|
| Na   | 4i             | 0.199 (8)   | 0   | 0.551 (4)  | 0.025 (7)           | 0.15   |
| Cr   | 2a             | 0           | 0   | 0          | 0.0316 (8)          | 0.9    |
| Sb   | 2a             | 0           | 0   | 0          | 0.0316 (8)          | 0.1    |
| O    | 4i             | 0.3808 (16) | 0   | 0.1778 (8) | 0.0122 (16)         | 1.0    |

Space group: *C2/m*  
Number of formula per unit cell (z) = 2  
Lattice parameters: a = 5.0313 (2) Å, b = 2.9110 (1) Å, c = 5.9457 (2) Å, α = γ = 90°, β = 106.75 (1)°
